# Supplementary material for: Validity and Reliability of the Daily Activity Behaviours Questionnaire (DABQ) for Assessment of Time Spent in Sleep, Sedentary Behaviour, and Physical Activity
Source: MDPI journal article supplement (doi:10.3390/ijerph19095362), 2022-04-28
Supplement: s1 [file s1]

**Table S1.** Test-retest reliability of the Daily Activity Behaviours Questionnaire (DABQ)—extended list.

| <b>Movement Behaviour</b>                | <b>DABQ1 Mean<br/>(SD), min/day</b> | <b>DABQ2 Mean<br/>(SD), min/day</b> | <b>ICC[A,1]<br/>(95% CI)</b> | <b>ICC[C,1]<br/>(95% CI)</b> | <b>Spearman's <math>\rho</math></b> |
|------------------------------------------|-------------------------------------|-------------------------------------|------------------------------|------------------------------|-------------------------------------|
| <b>Time in bed</b>                       | 453 (51)                            | 462 (62)                            | 0.63 (0.53, 0.71)            | 0.64 (0.53, 0.72)            | 0.67 (0.56, 0.76)                   |
| Sleep latency                            | 18 (14)                             | 17 (12)                             | 0.67 (0.57, 0.74)            | 0.67 (0.58, 0.75)            | 0.79 (0.71, 0.85)                   |
| Wake after sleep onset                   | 5 (12)                              | 3 (6)                               | 0.42 (0.29, 0.54)            | 0.44 (0.30, 0.55)            | 0.51 (0.36, 0.63)                   |
| Napping time                             | 6 (9)                               | 9 (12)                              | 0.32 (0.18, 0.46)            | 0.33 (0.19, 0.46)            | 0.43 (0.27, 0.57)                   |
| <b>Occupational time</b>                 | 559 (120)                           | 552 (110)                           | 0.77 (0.70, 0.83)            | 0.77 (0.70, 0.83)            | 0.74 (0.64, 0.81)                   |
| Occupational SB                          | 396 (129)                           | 362 (122)                           | 0.66 (0.55, 0.75)            | 0.68 (0.59, 0.76)            | 0.70 (0.60, 0.79)                   |
| Occupational PA                          | 163 (118)                           | 190 (125)                           | 0.72 (0.63, 0.79)            | 0.73 (0.65, 0.80)            | 0.73 (0.63, 0.81)                   |
| <b>Commuting time</b>                    | 60 (66)                             | 52 (61)                             | 0.91 (0.87, 0.93)            | 0.91 (0.88, 0.93)            | 0.87 (0.81, 0.91)                   |
| SB while commuting                       | 56 (68)                             | 48 (63)                             | 0.91 (0.88, 0.93)            | 0.92 (0.89, 0.94)            | 0.90 (0.85, 0.93)                   |
| PA while commuting                       | 4 (10)                              | 4 (10)                              | 0.88 (0.84, 0.91)            | 0.88 (0.84, 0.91)            | 0.92 (0.89, 0.95)                   |
| <b>Non-occupational time<sup>1</sup></b> | 430 (131)                           | 433 (127)                           | 0.75 (0.67, 0.81)            | 0.75 (0.67, 0.81)            | 0.73 (0.63, 0.81)                   |
| Non-occupational SB                      | 177 (119)                           | 207 (121)                           | 0.49 (0.36, 0.60)            | 0.50 (0.38, 0.61)            | 0.47 (0.31, 0.60)                   |
| Non-occupational PA                      | 253 (141)                           | 226 (134)                           | 0.59 (0.47, 0.68)            | 0.60 (0.49, 0.69)            | 0.60 (0.67, 0.71)                   |
| <b>Workday</b>                           |                                     |                                     |                              |                              |                                     |
| Sleep on workday                         | 391 (72)                            | 404 (77)                            | 0.62 (0.51, 0.71)            | 0.63 (0.53, 0.71)            | 0.66 (0.54, 0.75)                   |
| SB on workday                            | 628 (190)                           | 616 (186)                           | 0.62 (0.51, 0.71)            | 0.62 (0.51, 0.71)            | 0.57 (0.43, 0.68)                   |
| PA on workday                            | 421 (194)                           | 419 (191)                           | 0.69 (0.60, 0.77)            | 0.69 (0.60, 0.77)            | 0.67 (0.56, 0.76)                   |
| <b>Non-workday</b>                       |                                     |                                     |                              |                              |                                     |
| Sleep on non-workday                     | 498 (80)                            | 497 (93)                            | 0.53 (0.41, 0.63)            | 0.53 (0.41, 0.63)            | 0.69 (0.58, 0.78)                   |
| SB on non-workday                        | 391 (184)                           | 429 (195)                           | 0.48 (0.35, 0.59)            | 0.48 (0.36, 0.59)            | 0.46 (0.30, 0.59)                   |
| PA on non-workday                        | 551 (199)                           | 501 (194)                           | 0.59 (0.47, 0.68)            | 0.60 (0.50, 0.69)            | 0.57 (0.43, 0.68)                   |
| <b>Non-occupational PA</b>               |                                     |                                     |                              |                              |                                     |
| Walking                                  | 46 (40)                             | 44 (33)                             | 0.37 (0.23, 0.49)            | 0.37 (0.23, 0.49)            | 0.47 (0.31, 0.60)                   |
| Sport participation                      | 21 (27)                             | 21 (30)                             | 0.62 (0.52, 0.71)            | 0.62 (0.52, 0.71)            | 0.71 (0.61, 0.79)                   |
| Other demanding activity                 | 14 (23)                             | 12 (22)                             | 0.36 (0.22, 0.49)            | 0.36 (0.22, 0.49)            | 0.50 (0.35, 0.63)                   |

Abbreviations: DABQ1, Daily Activity Behaviours Questionnaire completed on the first occasion; DABQ2, Daily Activity Behaviours Questionnaire completed on the second occasion; Sleep, sleep duration; SB, time spent in sedentary behaviour; PA, time spent in physical activity; MSE, muscle-strengthening exercise; <sup>1</sup> non-occupational time on workday, excluding commuting time
